# Supplementary material for: What do novice faculty need to transition successfully to the nurse faculty role? An integrative review
Source: publisher site journal article supplement (doi:10.1515/ijnes-2021-0095), 2021-01-01
Supplement: Supplementary file 1 [file j_ijnes-2021-0095_suppl_001.docx]

Appendix A

CINAHL search terms and results (all searches are keyword unless noted)

| **#** | **Terms** | **Results** |
| --- | --- | --- |
| 1 | New OR novice | 576655 |
| 2 | (MH “Faculty, nursing”) | 16411 |
| 3 | 1 & 2 | 2441 |
| 4 | Role transition OR job change OR role change OR faculty role OR professional role OR acclimatization OR transitional program* | 52946 |
| 5 | Success* OR accomplish* OR achieve* OR professional competenc* | 396736 |
| 6 | retention | 37156 |
| 7 | 3 & 4 & 5 & 6 (limit all results 2000 – current) | 25 |

PubMed search terms and results (all searches are keyword unless noted)

| **#** | **Terms** | **Results** |
| --- | --- | --- |
| 1 | New OR novice | 3624868 |
| 2 | “faculty, nursing”[Mesh] | 9955 |
| 3 | 1 & 2 | 1398 |
| 4 | Role transition OR job change OR role change OR faculty role OR professional role OR acclimatization OR transitional program* | 757326 |
| 5 | Success* OR accomplish* OR achieve* OR professional competenc* | 2142610 |
| 6 | retention | 196162 |
| 7 | 3 & 4 & 5 & 6 (limit all results 2000 – current) | 15 |

Combining CINAHL and PubMed results = 40 citations

De-duplication of results = 35 citations
